# Supplementary material for: Mutation of Kinesin-6 Kif20b causes defects in cortical neuron polarization and morphogenesis
Source: PubMed Central journal article supplement (PMC5374676; doi:10.1186/s13064-017-0082-5), 2017-03-31

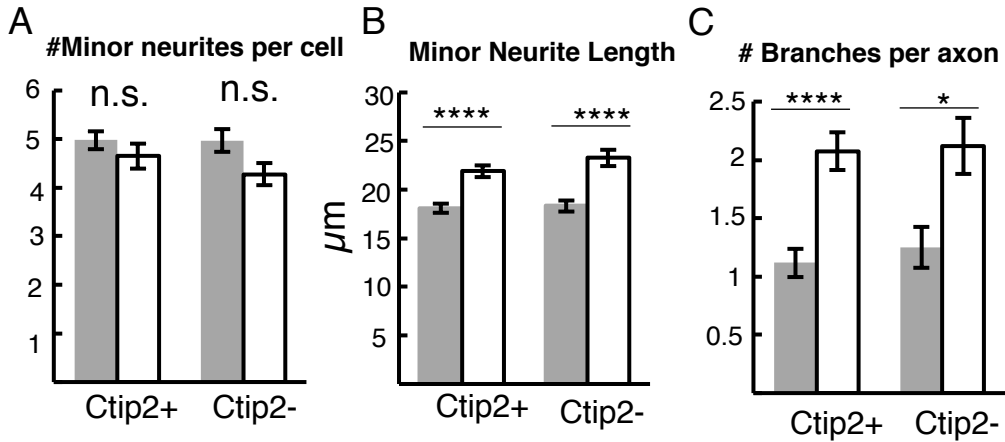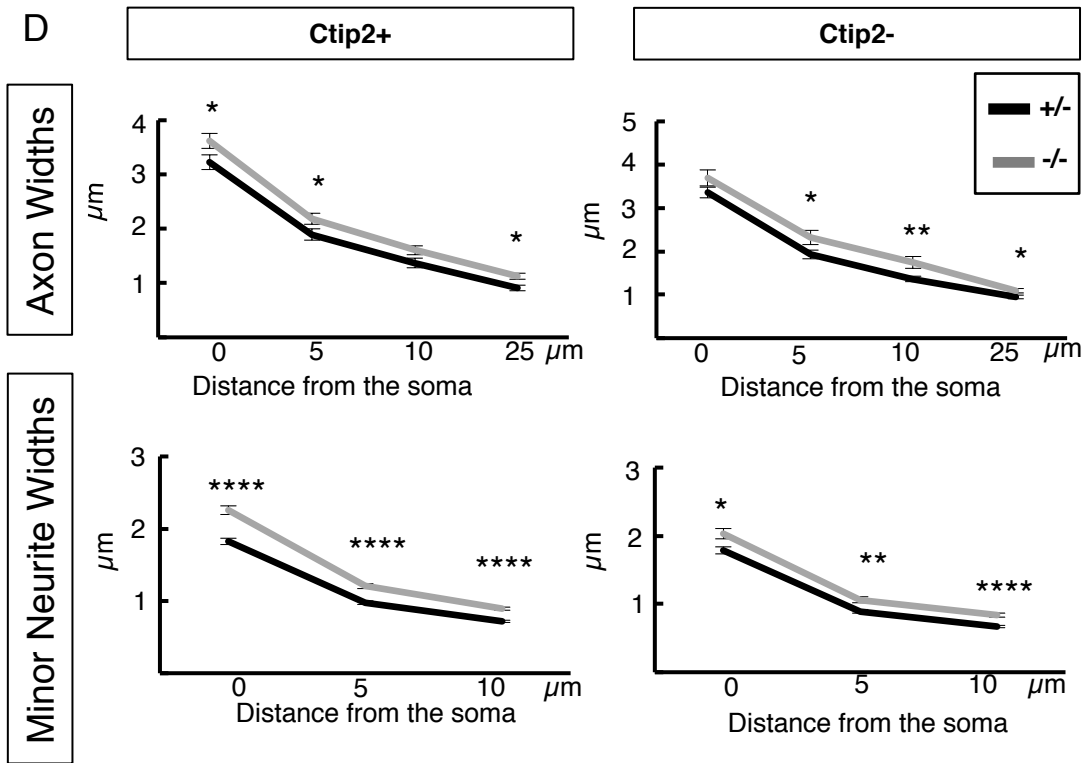

Supplement: 13064_2017_82_MOESM1_ESM.pdf [file 13064_2017_82_MOESM1_ESM.pdf]
